# Supplementary material
Source: ML conference proceedings conference paper supplement (https://openreview.net/forum?id=_-O9SefMb99)
Supplement: supplementary_material [file attachment]

---

# Division for LoveDA dataset

---

**Junjue Wang, Zhuo Zheng, Ailong Ma, Xiaoyan Lu, Yanfei Zhong**

State Key Laboratory of Information Engineering in Surveying, Mapping, and Remote Sensing  
Wuhan University, Wuhan 430074, China

{kingdrone,zhengzhuo,maailong007,luxiaoyan,zhongyanfei}@whu.edu.cn

| Domain | Geo-location   | #Images | Train | Val | Test |
|--------|----------------|---------|-------|-----|------|
| Rural  | Pukou          | 320     | ✓     |     |      |
|        | Gaochun        | 336     | ✓     |     |      |
|        | Lishui         | 336     | ✓     |     |      |
|        | Liuhe          | 320     |       | ✓   |      |
|        | Jiangning      | 336     |       |     | ✓    |
| Urban  | Qixia          | 320     | ✓     |     |      |
|        | Jianye         | 357     | ✓     |     |      |
|        | Gulou & Xuanwu | 320     | ✓     |     |      |
|        | Yuhuatai       | 357     |       | ✓   |      |
|        | Qinhuai        | 336     |       |     | ✓    |
| Total  |                | 3338    | 1989  | 677 | 672  |

Table 1: The division of the LoveDA dataset

## 1 Land-cover Semantic Segmentation

**Train set:** Pukou, Gaochun, Lishui, Qixia, Jianye, Gulou & Xuanwu.

**Val set:** Liuhe, Yuhuatai.

**Test set:** Jiangning, Qinhuai.

## 2 Unsupervised Domain Adaptation

### 2.1 Urban $\rightarrow$ Rural

**Oracle settings**

**Train set:** Pukou, Gaochun, Lishui.

**Val set:** Liuhe.

**Test set:** Jiangning.

**Domain Adaptation settings**

**Train set:** Qixia, Jianye, Gulou & Xuanwu.

**Val set:** Liuhe.

**Test set:** Jiangning.

### 2.2 Rural $\rightarrow$ Urban

**Oracle settings**

**Train set:** Qixia, Jianye, Gulou & Xuanwu.

**Val set:** Yuhuatai.

**Test set:** Qinhuai.

**Domain Adaptation settings**

**Train set:** Pukou, Gaochun, Lishui.

**Val set:** Yuhuatai.

**Test set:** Qinhuai.
